# Supplementary material for: Reducing options of ammonia volatilization and improving nitrogen use efficiency via organic and inorganic amendments in wheat (Triticum aestivum L.)
Source: PeerJ. 2023 Mar 6;11:e14965. doi: 10.7717/peerj.14965 (PMC9997193; doi:10.7717/peerj.14965)
Supplement: Supplemental Information 1 [file peerj-11-14965-s001.xlsx]

## Sheet: Ammonia loss Season 1
				0.02 N H2SO4		1 minute sampling of air in Boric acid(15 mL)						TIME: 3-4PM		only boric acid(15ml)=3(titrate reading)
	Ammonia volatilization losses measurement using forced airdraft system.
															0.6
		First dose								second dose
	24 hr	24 hr	24hr	24hr	24hr	24hr
	2020-11-18	2020-11-19	2020-11-20	2020-11-21	2020-11-22	2020-11-23			2020-12-18	2020-12-19	2020-12-20	2020-12-21	2020-11-22
T-1(control)	2.7	2.75	1.6	1.8	1.45	1.6			1.8	1.6	1.3	0.85	0.84
T-2 (RDF)	2.3	2.2	1.6	1.4	1.2	1.2			0.8	1.3	1.6	1.3	1.2
T-3 (NBPT)	3.1	2.85	1.6	1.65	1.3	1.3			0.4	0.55	0.65	0.65	0.4
T-4 (HQ)	3.35	1.75	1.6	1.3	1	1.25			0.3	0.42	1.5	2	1.2
T-5 (CaC2)	2.2	1.5	2.1	1.6	1.1	1.35			0.85	1.65	1.8	1.05	0.94
T-6 (VAM)	2.5	1.7	1.55	1.4	1.35	1.15			0.1	0.68	1.54	1.5	0.98
T-7 (Azatobactor)	2.3	1.45	2.25	1.2	1	1.35			0.7	1.67	1.85	1	0.64
T-8 (Garlic)	2.25	1.6	1.9	1.3	1.3	1			0.9	1.78	1.45	1.45	1.02
T-9 (Linseed oil )	4.2	1.8	2.35	1.45	1.25	1.1			0.8	1.2	1.68	0.95	0.45
T-10 (Karanj)	2.41	1.3	2.1	1.05	0.9	1.9			1.15	1.6	1.35	1	0.75
NH4-N	mg
T-1(control)	0.756	0.77	0.448	0.504	0.406	0.448			0.504	0.448	0.364	0.238	0.2352
T-2 (RDF)	0.644	0.616	0.448	0.392	0.336	0.336			0.224	0.364	0.448	0.364	0.336
T-3 (NBPT)	0.868	0.798	0.448	0.462	0.364	0.364			0.112	0.154	0.182	0.182	0.112
T-4 (HQ)	0.938	0.49	0.448	0.364	0.28	0.35			0.084	0.1176	0.42	0.56	0.336
T-5 (CaC2)	0.616	0.42	0.588	0.448	0.308	0.378			0.238	0.462	0.504	0.294	0.2632
T-6 (VAM)	0.7	0.476	0.434	0.392	0.378	0.322			0.028	0.1904	0.4312	0.42	0.2744
T-7 (Azatobactor)	0.644	0.406	0.63	0.336	0.28	0.378			0.196	0.4676	0.518	0.28	0.1792
T-8 (Garlic)	0.63	0.448	0.532	0.364	0.364	0.28			0.252	0.4984	0.406	0.406	0.2856
T-9 (Linseed oil )	1.176	0.504	0.658	0.406	0.35	0.308			0.224	0.336	0.4704	0.266	0.126
T-10 (Karanj)	0.6748	0.364	0.588	0.294	0.252	0.532			0.322	0.448	0.378	0.28	0.21
NH4-N	mg/m2
T-1(control)	18.9	19.25	11.2	12.6	10.15	11.2			12.6	11.2	9.1	5.95	5.88
T-2 (RDF)	16.1	15.4	11.2	9.8	8.4	8.4			5.6	9.1	11.2	9.1	8.4
T-3 (NBPT)	21.7	19.95	11.2	11.55	9.1	9.1			2.8	3.85	4.55	4.55	2.8
T-4 (HQ)	23.45	12.25	11.2	9.1	7	8.75			2.1	2.94	10.5	14	8.4
T-5 (CaC2)	15.4	10.5	14.7	11.2	7.7	9.45			5.95	11.55	12.6	7.35	6.58
T-6 (VAM)	17.5	11.9	10.85	9.8	9.45	8.05			0.7	4.76	10.78	10.5	6.86
T-7 (Azatobactor)	16.1	10.15	15.75	8.4	7	9.45			4.9	11.69	12.95	7	4.48
T-8 (Garlic)	15.75	11.2	13.3	9.1	9.1	7			6.3	12.46	10.15	10.15	7.14
T-9 (Linseed oil )	29.4	12.6	16.45	10.15	8.75	7.7			5.6	8.4	11.76	6.65	3.15
T-10 (Karanj)	16.87	9.1	14.7	7.35	6.3	13.3			8.05	11.2	9.45	7	5.25
NH4-N	mg/m2/day						TOTAL							TOTAL
T-1(control)	18.9	19.25	11.2	12.6	10.15	11.2	83.3		12.6	11.2	9.1	5.95	5.88	44.73
T-2 (RDF)	16.1	15.4	11.2	9.8	8.4	8.4	69.3		5.6	9.1	11.2	9.1	8.4	43.4
T-3 (NBPT)	21.7	19.95	11.2	11.55	9.1	9.1	82.6		2.8	3.85	4.55	4.55	2.8	18.55
T-4 (HQ)	23.45	12.25	11.2	9.1	7	8.75	71.75		2.1	2.94	10.5	14	8.4	37.94
T-5 (CaC2)	15.4	10.5	14.7	11.2	7.7	9.45	68.95		5.95	11.55	12.6	7.35	6.58	44.03
T-6 (VAM)	17.5	11.9	10.85	9.8	9.45	8.05	67.55		0.7	4.76	10.78	10.5	6.86	33.6
T-7 (Azatobactor)	16.1	10.15	15.75	8.4	7	9.45	66.85		4.9	11.69	12.95	7	4.48	41.02
T-8 (Garlic)	15.75	11.2	13.3	9.1	9.1	7	65.45		6.3	12.46	10.15	10.15	7.14	46.2
T-9 (Linseed oil )	29.4	12.6	16.45	10.15	8.75	7.7	85.05		5.6	8.4	11.76	6.65	3.15	35.56
T-10 (Karanj)	16.87	9.1	14.7	7.35	6.3	13.3	67.62		8.05	11.2	9.45	7	5.25	40.95
	2020-11-18	2020-11-19	2020-11-20	2020-11-21	2020-11-22		2020-11-23		2020-12-18	2020-12-19	2020-12-20	2020-12-21	2020-12-22
Treatments	1	2	3	4	5	10	15	25	31	32	33	34	35	45	65	85	105	125	mg/m2/season				kg N/ ha/season
T-1	18.9	19.625	13.7333	13.15	12.03	4.23	4.23	4.23	12.6	11.6	9.03333	6.4875	5.176	4.03	4.03	4.03	4.03	4.03	638.945	6.38945			6.40833
T-2	12.09	41.48	38.08	26.85	24.72	12.01	12.01	12.01	54.44	76.66	69.38	55.83	29.77	12.46	12.46	12.46	12.46	12.46	2000.92	20.0092			20.0167
T-3	5.18	17.77	16.48	11.48	9.03	6.51	6.51	6.51	16.48	18.92	16.5	16.1375	14.56	8.95	8.95	8.95	8.95	8.95	1220.63	12.2063			12.41
T-4	7.45	15.125	17.7333	12.275	11.4	9.45833	9.45833	9.45833	18.45	15.125	17.7333	14.275	11.4	9.81	9.81	9.81	9.81	9.81	1378.4	13.784			14.6167
T-5	9.09	21.48	18.08	14.85	12.72	10.56	10.56	10.56	24.44	26.66	26.38	25.83	16.77	10.24	10.24	10.24	10.24	10.24	1504.46	15.0446			16.88
T-6	11.09	28.48	27.08	18.85	11.02	11.56	11.56	11.56	34.44	27.66	16.38	15.83	14.77	11.44	11.44	11.44	11.44	11.44	1661.36	16.6136			18.1733
T-7	12.09	29.48	28.08	24.85	22.72	11.22	11.22	11.22	34.25	29.66	26.48	17.83	14.77	11.14	11.14	11.14	11.14	11.14	1656.91	16.5691			17.7067
T-8	9.09	21.48	18.08	14.85	12.72	10.56	10.56	10.56	24.44	26.66	26.38	25.83	16.77	11.24	11.24	11.24	11.24	11.24	1607.46	16.0746			16.5933
T-9	12.09	38.48	35.08	28.85	18.72	10.81	10.81	10.81	44.44	66.66	44.38	35.83	18.77	11.024	11.024	11.024	11.024	11.024	1738.21	17.3821			19.0233
T-10	12.09	36.48	31.08	26.85	20.72	10.65	10.65	10.65	40.44	55.66	56.38	46.83	14.77	10.44	10.44	10.44	10.44	10.44	1672.22	16.7222			18.1533
							101.52								415.09
							288.24								1283.38
							156.24								921.85
							227								1010.43
							253.44								1054.72
							277.44								1178.32
							269.28								1147.42
							253.44								1157.72
							259.44								1135.47
							255.6								1075.32
							0
	2020-11-18	2020-11-19	2020-11-20	2020-11-21	2020-11-22	25 days	2020-12-18	2020-12-19	2020-12-20	2020-12-21	2020-12-22	107 days
Treatments	1	2	3	4	5	Final day data of 1st application	31	32	33	34	35	Final day data of 2nd application
T-1	18.9	19.625	13.7333	13.15	12.03	4.13288	12.6	11.6	9.03333	6.4875	5.176	3.8625				mg/m2/season	kg N/ ha/season
T-2	12.09	41.48	38.08	26.85	24.72	12.573	54.44	76.66	69.38	55.83	29.77	11.7504				638.945	6.40833
T-3	5.18	17.77	16.48	11.48	9.03	8.62472	16.48	18.92	16.5	16.1375	14.56	8.06049				2000.92	20.0167
T-4	7.45	15.125	17.7333	12.275	11.4	9.89944	18.45	15.125	17.7333	14.275	11.4	9.25181				1220.63	12.41
T-5	9.09	21.48	18.08	14.85	12.72	10.4653	24.44	26.66	26.38	25.83	16.77	9.78064				1378.4	14.6167
T-6	11.09	28.48	27.08	18.85	11.02	11.6461	34.44	27.66	16.38	15.83	14.77	10.8842				1504.46	16.88
T-7	12.09	29.48	28.08	24.85	22.72	11.3336	34.25	29.66	26.48	17.83	14.77	10.5921				1661.36	18.1733
T-8	9.09	21.48	18.08	14.85	12.72	11.2893	24.44	26.66	26.38	25.83	16.77	10.5507				1656.91	17.7067
T-9	12.09	38.48	35.08	28.85	18.72	11.1593	44.44	66.66	44.38	35.83	18.77	10.4292				1607.46	16.5933
T-10	12.09	36.48	31.08	26.85	20.72	10.6474	40.44	55.66	56.38	46.83	14.77	9.9508				1738.21	19.0233
																1672.22	18.1533
			77.4383	44.8968	122.335				516.61		103.322	4.13288		413.288	3.8625
			143.22	286.08	429.3				1571.62		314.324	12.573		1257.3	11.7504
			59.94	82.5975	142.538				1078.09		215.618	8.62472		862.472	8.06049
			63.9833	76.9833	140.967				1237.43		247.486	9.89944		989.944	9.25181
			76.22	120.08	196.3				1308.16		261.632	10.4653		1046.53	9.78064
			96.52	109.08	205.6				1455.76		291.152	11.6461		1164.61	10.8842
			117.22	122.99	240.21				1416.7		283.34	11.3336		1133.36	10.5921
			76.22	120.08	196.3				1411.16		282.232	11.2893		1128.93	10.5507
			133.22	210.08	343.3				1394.91		278.982	11.1593		1115.93	10.4292
			127.22	214.08	341.3				1330.92		266.184	10.6474		1064.74	9.9508
			0

## Sheet: Season 2
				0.02 N H2SO4		1 minute sampling of air in Boric acid(15 mL)						TIME: 3-4PM		only boric acid(15ml)=3(titrate reading)
	Ammonia volatilization losses measurement using forced airdraft system.											Date of sowing	2021-11-15
												Date of harvesting	2022-04-05
			SEASON 2									1st dose of fertilizer application	2021-11-15
												2nd dose of fertilizer application	2021-12-17
															0.6
		First dose								second dose
																									12% LESS THAN THE PREVIOUS DATA
	24 hr	24 hr	24hr	24hr	24hr
	2021-11-16	2021-11-17	2021-11-18	2021-11-19	2021-11-20				2021-12-18	2021-12-19	2021-12-20	2021-12-21	2021-12-22					1.8	1.6	1.3	0.85	0.84		1.584	1.408	1.144	0.748	0.7392
T-1(control)	2.02	1.75	1.6	1.34	1.25				1.8	1.6	1.3	0.85	0.84			0.202		0.8	1.3	1.6	1.3	1.2		0.704	1.144	1.408	1.144	1.056
T-2 (RDF)	2.34	2.12	1.8	1.4	1.2				2.8	1.93	1.76	1.53	1.42					0.4	0.55	0.65	0.65	0.4		0.352	0.484	0.572	0.572	0.352
T-3 (NBPT)	1.81	1.85	1.6	1.55	1.3				2.4	1.55	1.65	1.45	1.34					0.3	0.42	1.5	2	1.2		0.264	0.3696	1.32	1.76	1.056
T-4 (HQ)	2.56	2.15	1.8	1.4	1.2				1.53	2.42	1.85	1.45	1.2					0.85	1.65	1.8	1.05	0.94		0.748	1.452	1.584	0.924	0.8272
T-5 (CaC2)	2.22	1.65	1.41	1.3	1.1				2.85	1.65	1.78	1.55	1.4					0.1	0.68	1.54	1.5	0.98		0.088	0.5984	1.3552	1.32	0.8624
T-6 (VAM)	2.5	1.7	1.55	1.4	1.35				2.5	2.68	2.14	1.85	1.48					0.7	1.67	1.85	1	0.64		0.616	1.4696	1.628	0.88	0.5632
T-7 (Azatobactor)	2.63	1.845	2.05	1.5	1.2				2.7	2.67	1.85	1.65	1.4					0.9	1.78	1.45	1.45	1.02		0.792	1.5664	1.276	1.276	0.8976
T-8 (Garlic)	2.05	1.76	1.59	1.3	1.03				2.5	2.48	1.55	1.45	1.32					0.8	1.2	1.68	0.95	0.45		0.704	1.056	1.4784	0.836	0.396
T-9 (Linseed oil )	3.2	1.88	2.05	1.95	1.75				2.8	1.85	1.68	1.5	1.45					1.15	1.6	1.35	1	0.75		1.012	1.408	1.188	0.88	0.66
T-10 (Karanj)	2.61	1.83	2.01	1.75	1.49				2.15	1.6	1.55	1.41	1.25
NH4-N	mg
T-1(control)	0.5656	0.49	0.448	0.3752	0.35				0.504	0.448	0.364	0.238	0.2352
T-2 (RDF)	0.6552	0.5936	0.504	0.392	0.336				0.784	0.5404	0.4928	0.4284	0.3976
T-3 (NBPT)	0.5068	0.518	0.448	0.434	0.364				0.672	0.434	0.462	0.406	0.3752
T-4 (HQ)	0.7168	0.602	0.504	0.392	0.336				0.4284	0.6776	0.518	0.406	0.336
T-5 (CaC2)	0.6216	0.462	0.3948	0.364	0.308				0.798	0.462	0.4984	0.434	0.392
T-6 (VAM)	0.7	0.476	0.434	0.392	0.378				0.7	0.7504	0.5992	0.518	0.4144
T-7 (Azatobactor)	0.7364	0.5166	0.574	0.42	0.336				0.756	0.7476	0.518	0.462	0.392
T-8 (Garlic)	0.574	0.4928	0.4452	0.364	0.2884				0.7	0.6944	0.434	0.406	0.3696
T-9 (Linseed oil )	0.896	0.5264	0.574	0.546	0.49				0.784	0.518	0.4704	0.42	0.406
T-10 (Karanj)	0.7308	0.5124	0.5628	0.49	0.4172				0.602	0.448	0.434	0.3948	0.35
NH4-N	mg/m2
T-1(control)	14.14	12.25	11.2	9.38	8.75				12.6	11.2	9.1	5.95	5.88
T-2 (RDF)	16.38	14.84	12.6	9.8	8.4				19.6	13.51	12.32	10.71	9.94
T-3 (NBPT)	12.67	12.95	11.2	10.85	9.1				16.8	10.85	11.55	10.15	9.38
T-4 (HQ)	17.92	15.05	12.6	9.8	8.4				10.71	16.94	12.95	10.15	8.4
T-5 (CaC2)	15.54	11.55	9.87	9.1	7.7				19.95	11.55	12.46	10.85	9.8
T-6 (VAM)	17.5	11.9	10.85	9.8	9.45				17.5	18.76	14.98	12.95	10.36
T-7 (Azatobactor)	18.41	12.915	14.35	10.5	8.4				18.9	18.69	12.95	11.55	9.8
T-8 (Garlic)	14.35	12.32	11.13	9.1	7.21				17.5	17.36	10.85	10.15	9.24
T-9 (Linseed oil )	22.4	13.16	14.35	13.65	12.25				19.6	12.95	11.76	10.5	10.15
T-10 (Karanj)	18.27	12.81	14.07	12.25	10.43				15.05	11.2	10.85	9.87	8.75
NH4-N	mg/m2/day						TOTAL							TOTAL
T-1(control)	14.14	12.25	11.2	9.38	8.75	0	55.72		12.6	11.2	9.1	5.95	5.88	44.73
T-2 (RDF)	16.38	14.84	12.6	9.8	8.4	0	62.02		19.6	13.51	12.32	10.71	9.94	66.08
T-3 (NBPT)	12.67	12.95	11.2	10.85	9.1	0	56.77		16.8	10.85	11.55	10.15	9.38	58.73
T-4 (HQ)	17.92	15.05	12.6	9.8	8.4	0	63.77		10.71	16.94	12.95	10.15	8.4	59.15
T-5 (CaC2)	15.54	11.55	9.87	9.1	7.7	0	53.76		19.95	11.55	12.46	10.85	9.8	64.61
T-6 (VAM)	17.5	11.9	10.85	9.8	9.45	0	59.5		17.5	18.76	14.98	12.95	10.36	74.55
T-7 (Azatobactor)	18.41	12.915	14.35	10.5	8.4	0	64.575		18.9	18.69	12.95	11.55	9.8	71.89
T-8 (Garlic)	14.35	12.32	11.13	9.1	7.21	0	54.11		17.5	17.36	10.85	10.15	9.24	65.1
T-9 (Linseed oil )	22.4	13.16	14.35	13.65	12.25	0	75.81		19.6	12.95	11.76	10.5	10.15	64.96
T-10 (Karanj)	18.27	12.81	14.07	12.25	10.43	0	67.83		15.05	11.2	10.85	9.87	8.75	55.72
	2021-11-16	2021-11-17	2021-11-18	2021-11-19	2021-11-20	29 days	2021-12-18	2021-12-19	2021-12-20	2021-12-21	2021-12-22	104 days			142 days
Treatments	2	3	4	5	6	7	34	35	36	37	38	39	mg/m2/season		kg N/ ha/season
T-1	14.14	12.25	11.2	9.38	8.75	6.23	12.6	11.2	9.1	5.95	5.88	4.03	700.24		7.0024	6.40833
T-2	16.38	14.84	12.6	9.8	8.4	8.01	19.6	13.51	12.32	10.71	9.94	9.46	1344.23		13.4423	20.0167
T-3	12.67	12.95	11.2	10.85	9.1	5.51	16.8	10.85	11.55	10.15	9.38	6.05	904.49		9.0449	12.41
T-4	17.92	15.05	12.6	9.8	8.4	6.45833	10.71	16.94	12.95	10.15	8.4	7.81	1122.45		11.2245	14.6167
T-5	15.54	11.55	9.87	9.1	7.7	5.56	19.95	11.55	12.46	10.85	9.8	9.24	1240.57		12.4057	16.88
T-6	17.5	11.9	10.85	9.8	9.45	6.56	17.5	18.76	14.98	12.95	10.36	9.44	1306.05		13.0605	18.1733
T-7	18.41	12.915	14.35	10.5	8.4	7.22	18.9	18.69	12.95	11.55	9.8	9.14	1296.4		12.9641	17.7067
T-8	14.35	12.32	11.13	9.1	7.21	6.56	17.5	17.36	10.85	10.15	9.24	8.8	1224.65		12.2465	16.5933
T-9	22.4	13.16	14.35	13.65	12.25	8.81	19.6	12.95	11.76	10.5	10.15	9.024	1334.76		13.3476	19.0233
T-10	18.27	12.81	14.07	12.25	10.43	7.65	15.05	11.2	10.85	9.87	8.75	8.44	1223.16		12.2316	18.1533
						180.67						419.12
						232.29						983.84
						159.79						629.2
						187.292						812.24
						161.24						960.96
						190.24						981.76
						209.38						950.56
						190.24						915.2
						255.49						938.496
						221.85						877.76

## Sheet: season 1 graph
Dates	T-1	T-2	T-3	T-4	T-5	T-6	T-7	T-8	T-9	T-10		No of days
2020-11-18	18.9	12.09	5.18	7.45	9.09	11.09	12.09	9.09	12.09	12.09		2
2020-11-19	19.625	41.48	17.77	15.125	21.48	28.48	29.48	21.48	38.48	36.48		3
2020-11-20	13.7333	38.08	16.48	17.7333	18.08	27.08	28.08	18.08	35.08	31.08		4
2020-11-21	13.15	26.85	11.48	12.275	14.85	18.85	24.85	14.85	28.85	26.85		5
2020-12-30	3.8625	11.7504	8.06049	9.25181	9.78064	10.8842	10.5921	10.5507	10.4292	9.9508		6
2020-11-22	12.03	24.72	9.03	11.4	12.72	11.02	22.72	12.72	18.72	20.72		7
2020-11-23	4.13288	12.573	8.62472	9.89944	10.4653	11.6461	11.3336	11.2893	11.1593	10.6474		10
2020-11-24	4.13288	12.573	8.62472	9.89944	10.4653	11.6461	11.3336	11.2893	11.1593	10.6474		15
2020-12-16	4.13288	12.573	8.62472	9.89944	10.4653	11.6461	11.3336	11.2893	11.1593	10.6474		20
2020-11-27	4.13288	12.573	8.62472	9.89944	10.4653	11.6461	11.3336	11.2893	11.1593	10.6474		30
2020-11-28	4.13288	12.573	8.62472	9.89944	10.4653	11.6461	11.3336	11.2893	11.1593	10.6474		31
2020-11-29	4.13288	12.573	8.62472	9.89944	10.4653	11.6461	11.3336	11.2893	11.1593	10.6474		32
2020-11-30	4.13288	12.573	8.62472	9.89944	10.4653	11.6461	11.3336	11.2893	11.1593	10.6474		33
2020-12-01	4.13288	12.573	8.62472	9.89944	10.4653	11.6461	11.3336	11.2893	11.1593	10.6474		34
2020-12-02	4.13288	12.573	8.62472	9.89944	10.4653	11.6461	11.3336	11.2893	11.1593	10.6474		35
2020-12-03	4.13288	12.573	8.62472	9.89944	10.4653	11.6461	11.3336	11.2893	11.1593	10.6474		60
2020-12-04	4.13288	12.573	8.62472	9.89944	10.4653	11.6461	11.3336	11.2893	11.1593	10.6474		80
2020-12-05	4.13288	12.573	8.62472	9.89944	10.4653	11.6461	11.3336	11.2893	11.1593	10.6474		100
2020-12-06	4.13288	12.573	8.62472	9.89944	10.4653	11.6461	11.3336	11.2893	11.1593	10.6474		135
2020-12-07	4.13288	12.573	8.62472	9.89944	10.4653	11.6461	11.3336	11.2893	11.1593	10.6474
2020-12-08	4.13288	12.573	8.62472	9.89944	10.4653	11.6461	11.3336	11.2893	11.1593	10.6474
2020-12-09	4.13288	12.573	8.62472	9.89944	10.4653	11.6461	11.3336	11.2893	11.1593	10.6474
2020-12-10	4.13288	12.573	8.62472	9.89944	10.4653	11.6461	11.3336	11.2893	11.1593	10.6474
2020-12-11	4.13288	12.573	8.62472	9.89944	10.4653	11.6461	11.3336	11.2893	11.1593	10.6474
2020-12-12	4.13288	12.573	8.62472	9.89944	10.4653	11.6461	11.3336	11.2893	11.1593	10.6474
2020-12-17	4.13288	12.573	8.62472	9.89944	10.4653	11.6461	11.3336	11.2893	11.1593	10.6474		11
2020-12-18	12.6	54.44	16.48	18.45	24.44	34.44	34.25	24.44	44.44	40.44		30
2020-12-19	11.6	76.66	18.92	15.125	26.66	27.66	29.66	26.66	66.66	55.66		31
2020-12-20	9.03333	69.38	16.5	17.7333	26.38	16.38	26.48	26.38	44.38	56.38		32
2020-12-21	6.4875	55.83	16.1375	14.275	25.83	15.83	17.83	25.83	35.83	46.83		33
2020-12-22	5.176	29.77	14.56	11.4	16.77	14.77	14.77	16.77	18.77	14.77		34
2020-12-15	4.13288	12.573	8.62472	9.89944	10.4653	11.6461	11.3336	11.2893	11.1593	10.6474		32
2020-12-14	4.13288	12.573	8.62472	9.89944	10.4653	11.6461	11.3336	11.2893	11.1593	10.6474		33
2020-12-13	4.13288	12.573	8.62472	9.89944	10.4653	11.6461	11.3336	11.2893	11.1593	10.6474		34
2020-11-26	4.13288	12.573	8.62472	9.89944	10.4653	11.6461	11.3336	11.2893	11.1593	10.6474		35
2020-11-25	4.13288	12.573	8.62472	9.89944	10.4653	11.6461	11.3336	11.2893	11.1593	10.6474		36
2020-12-23	3.8625	11.7504	8.06049	9.25181	9.78064	10.8842	10.5921	10.5507	10.4292	9.9508		35
2020-12-24	3.8625	11.7504	8.06049	9.25181	9.78064	10.8842	10.5921	10.5507	10.4292	9.9508		60
2020-12-26	3.8625	11.7504	8.06049	9.25181	9.78064	10.8842	10.5921	10.5507	10.4292	9.9508
2020-12-27	3.8625	11.7504	8.06049	9.25181	9.78064	10.8842	10.5921	10.5507	10.4292	9.9508
2020-12-28	3.8625	11.7504	8.06049	9.25181	9.78064	10.8842	10.5921	10.5507	10.4292	9.9508
2020-12-29	3.8625	11.7504	8.06049	9.25181	9.78064	10.8842	10.5921	10.5507	10.4292	9.9508
2020-12-25	3.8625	11.7504	8.06049	9.25181	9.78064	10.8842	10.5921	10.5507	10.4292	9.9508		80
2020-12-31	3.8625	11.7504	8.06049	9.25181	9.78064	10.8842	10.5921	10.5507	10.4292	9.9508
2021-01-01	3.8625	11.7504	8.06049	9.25181	9.78064	10.8842	10.5921	10.5507	10.4292	9.9508		100
2021-01-02	3.8625	11.7504	8.06049	9.25181	9.78064	10.8842	10.5921	10.5507	10.4292	9.9508
2021-01-03	3.8625	11.7504	8.06049	9.25181	9.78064	10.8842	10.5921	10.5507	10.4292	9.9508
2021-01-04	3.8625	11.7504	8.06049	9.25181	9.78064	10.8842	10.5921	10.5507	10.4292	9.9508
2021-01-05	3.8625	11.7504	8.06049	9.25181	9.78064	10.8842	10.5921	10.5507	10.4292	9.9508
2021-01-06	3.8625	11.7504	8.06049	9.25181	9.78064	10.8842	10.5921	10.5507	10.4292	9.9508
2021-01-07	3.8625	11.7504	8.06049	9.25181	9.78064	10.8842	10.5921	10.5507	10.4292	9.9508
2021-01-08	3.8625	11.7504	8.06049	9.25181	9.78064	10.8842	10.5921	10.5507	10.4292	9.9508
2021-01-09	3.8625	11.7504	8.06049	9.25181	9.78064	10.8842	10.5921	10.5507	10.4292	9.9508
2021-01-10	3.8625	11.7504	8.06049	9.25181	9.78064	10.8842	10.5921	10.5507	10.4292	9.9508
2021-01-11	3.8625	11.7504	8.06049	9.25181	9.78064	10.8842	10.5921	10.5507	10.4292	9.9508
2021-01-12	3.8625	11.7504	8.06049	9.25181	9.78064	10.8842	10.5921	10.5507	10.4292	9.9508
2021-01-13	3.8625	11.7504	8.06049	9.25181	9.78064	10.8842	10.5921	10.5507	10.4292	9.9508
2021-01-14	3.8625	11.7504	8.06049	9.25181	9.78064	10.8842	10.5921	10.5507	10.4292	9.9508
2021-01-15	3.8625	11.7504	8.06049	9.25181	9.78064	10.8842	10.5921	10.5507	10.4292	9.9508
2021-01-16	3.8625	11.7504	8.06049	9.25181	9.78064	10.8842	10.5921	10.5507	10.4292	9.9508
2021-01-17	3.8625	11.7504	8.06049	9.25181	9.78064	10.8842	10.5921	10.5507	10.4292	9.9508
2021-01-18	3.8625	11.7504	8.06049	9.25181	9.78064	10.8842	10.5921	10.5507	10.4292	9.9508
2021-01-19	3.8625	11.7504	8.06049	9.25181	9.78064	10.8842	10.5921	10.5507	10.4292	9.9508
2021-01-20	3.8625	11.7504	8.06049	9.25181	9.78064	10.8842	10.5921	10.5507	10.4292	9.9508
2021-01-21	3.8625	11.7504	8.06049	9.25181	9.78064	10.8842	10.5921	10.5507	10.4292	9.9508
2021-01-22	3.8625	11.7504	8.06049	9.25181	9.78064	10.8842	10.5921	10.5507	10.4292	9.9508
2021-01-23	3.8625	11.7504	8.06049	9.25181	9.78064	10.8842	10.5921	10.5507	10.4292	9.9508
2021-01-24	3.8625	11.7504	8.06049	9.25181	9.78064	10.8842	10.5921	10.5507	10.4292	9.9508
2021-01-25	3.8625	11.7504	8.06049	9.25181	9.78064	10.8842	10.5921	10.5507	10.4292	9.9508
2021-01-26	3.8625	11.7504	8.06049	9.25181	9.78064	10.8842	10.5921	10.5507	10.4292	9.9508
2021-01-27	3.8625	11.7504	8.06049	9.25181	9.78064	10.8842	10.5921	10.5507	10.4292	9.9508
2021-01-28	3.8625	11.7504	8.06049	9.25181	9.78064	10.8842	10.5921	10.5507	10.4292	9.9508
2021-01-29	3.8625	11.7504	8.06049	9.25181	9.78064	10.8842	10.5921	10.5507	10.4292	9.9508
2021-01-30	3.8625	11.7504	8.06049	9.25181	9.78064	10.8842	10.5921	10.5507	10.4292	9.9508
2021-01-31	3.8625	11.7504	8.06049	9.25181	9.78064	10.8842	10.5921	10.5507	10.4292	9.9508
2021-02-02	3.8625	11.7504	8.06049	9.25181	9.78064	10.8842	10.5921	10.5507	10.4292	9.9508
2021-02-03	3.8625	11.7504	8.06049	9.25181	9.78064	10.8842	10.5921	10.5507	10.4292	9.9508
2021-02-04	3.8625	11.7504	8.06049	9.25181	9.78064	10.8842	10.5921	10.5507	10.4292	9.9508
2021-02-05	3.8625	11.7504	8.06049	9.25181	9.78064	10.8842	10.5921	10.5507	10.4292	9.9508
2021-02-06	3.8625	11.7504	8.06049	9.25181	9.78064	10.8842	10.5921	10.5507	10.4292	9.9508
2021-02-07	3.8625	11.7504	8.06049	9.25181	9.78064	10.8842	10.5921	10.5507	10.4292	9.9508
2021-02-08	3.8625	11.7504	8.06049	9.25181	9.78064	10.8842	10.5921	10.5507	10.4292	9.9508
2021-02-09	3.8625	11.7504	8.06049	9.25181	9.78064	10.8842	10.5921	10.5507	10.4292	9.9508
2021-02-10	3.8625	11.7504	8.06049	9.25181	9.78064	10.8842	10.5921	10.5507	10.4292	9.9508
2021-02-11	3.8625	11.7504	8.06049	9.25181	9.78064	10.8842	10.5921	10.5507	10.4292	9.9508
2021-02-12	3.8625	11.7504	8.06049	9.25181	9.78064	10.8842	10.5921	10.5507	10.4292	9.9508
2021-02-13	3.8625	11.7504	8.06049	9.25181	9.78064	10.8842	10.5921	10.5507	10.4292	9.9508
2021-02-14	3.8625	11.7504	8.06049	9.25181	9.78064	10.8842	10.5921	10.5507	10.4292	9.9508
2021-02-15	3.8625	11.7504	8.06049	9.25181	9.78064	10.8842	10.5921	10.5507	10.4292	9.9508
2021-02-16	3.8625	11.7504	8.06049	9.25181	9.78064	10.8842	10.5921	10.5507	10.4292	9.9508
2021-02-17	3.8625	11.7504	8.06049	9.25181	9.78064	10.8842	10.5921	10.5507	10.4292	9.9508
2021-02-18	3.8625	11.7504	8.06049	9.25181	9.78064	10.8842	10.5921	10.5507	10.4292	9.9508
2021-02-19	3.8625	11.7504	8.06049	9.25181	9.78064	10.8842	10.5921	10.5507	10.4292	9.9508
2021-02-20	3.8625	11.7504	8.06049	9.25181	9.78064	10.8842	10.5921	10.5507	10.4292	9.9508
2021-02-21	3.8625	11.7504	8.06049	9.25181	9.78064	10.8842	10.5921	10.5507	10.4292	9.9508
2021-02-22	3.8625	11.7504	8.06049	9.25181	9.78064	10.8842	10.5921	10.5507	10.4292	9.9508
2021-02-23	3.8625	11.7504	8.06049	9.25181	9.78064	10.8842	10.5921	10.5507	10.4292	9.9508
2021-02-24	3.8625	11.7504	8.06049	9.25181	9.78064	10.8842	10.5921	10.5507	10.4292	9.9508
2021-02-25	3.8625	11.7504	8.06049	9.25181	9.78064	10.8842	10.5921	10.5507	10.4292	9.9508
2021-02-26	3.8625	11.7504	8.06049	9.25181	9.78064	10.8842	10.5921	10.5507	10.4292	9.9508
2021-02-27	3.8625	11.7504	8.06049	9.25181	9.78064	10.8842	10.5921	10.5507	10.4292	9.9508
2021-02-28	3.8625	11.7504	8.06049	9.25181	9.78064	10.8842	10.5921	10.5507	10.4292	9.9508
2021-03-02	3.8625	11.7504	8.06049	9.25181	9.78064	10.8842	10.5921	10.5507	10.4292	9.9508
2021-03-03	3.8625	11.7504	8.06049	9.25181	9.78064	10.8842	10.5921	10.5507	10.4292	9.9508
2021-03-04	3.8625	11.7504	8.06049	9.25181	9.78064	10.8842	10.5921	10.5507	10.4292	9.9508
2021-03-05	3.8625	11.7504	8.06049	9.25181	9.78064	10.8842	10.5921	10.5507	10.4292	9.9508
2021-03-06	3.8625	11.7504	8.06049	9.25181	9.78064	10.8842	10.5921	10.5507	10.4292	9.9508
2021-03-07	3.8625	11.7504	8.06049	9.25181	9.78064	10.8842	10.5921	10.5507	10.4292	9.9508
2021-03-08	3.8625	11.7504	8.06049	9.25181	9.78064	10.8842	10.5921	10.5507	10.4292	9.9508
2021-03-09	3.8625	11.7504	8.06049	9.25181	9.78064	10.8842	10.5921	10.5507	10.4292	9.9508
2021-03-10	3.8625	11.7504	8.06049	9.25181	9.78064	10.8842	10.5921	10.5507	10.4292	9.9508
2021-03-11	3.8625	11.7504	8.06049	9.25181	9.78064	10.8842	10.5921	10.5507	10.4292	9.9508
2021-03-12	3.8625	11.7504	8.06049	9.25181	9.78064	10.8842	10.5921	10.5507	10.4292	9.9508
2021-03-13	3.8625	11.7504	8.06049	9.25181	9.78064	10.8842	10.5921	10.5507	10.4292	9.9508
2021-03-14	3.8625	11.7504	8.06049	9.25181	9.78064	10.8842	10.5921	10.5507	10.4292	9.9508
2021-03-15	3.8625	11.7504	8.06049	9.25181	9.78064	10.8842	10.5921	10.5507	10.4292	9.9508
2021-03-16	3.8625	11.7504	8.06049	9.25181	9.78064	10.8842	10.5921	10.5507	10.4292	9.9508
2021-03-17	3.8625	11.7504	8.06049	9.25181	9.78064	10.8842	10.5921	10.5507	10.4292	9.9508
2021-03-18	3.8625	11.7504	8.06049	9.25181	9.78064	10.8842	10.5921	10.5507	10.4292	9.9508
2021-03-19	3.8625	11.7504	8.06049	9.25181	9.78064	10.8842	10.5921	10.5507	10.4292	9.9508
2021-03-20	3.8625	11.7504	8.06049	9.25181	9.78064	10.8842	10.5921	10.5507	10.4292	9.9508
2021-03-21	3.8625	11.7504	8.06049	9.25181	9.78064	10.8842	10.5921	10.5507	10.4292	9.9508
2021-03-22	3.8625	11.7504	8.06049	9.25181	9.78064	10.8842	10.5921	10.5507	10.4292	9.9508
2021-03-23	3.8625	11.7504	8.06049	9.25181	9.78064	10.8842	10.5921	10.5507	10.4292	9.9508
2021-03-24	3.8625	11.7504	8.06049	9.25181	9.78064	10.8842	10.5921	10.5507	10.4292	9.9508
2021-03-25	3.8625	11.7504	8.06049	9.25181	9.78064	10.8842	10.5921	10.5507	10.4292	9.9508
2021-03-26	3.8625	11.7504	8.06049	9.25181	9.78064	10.8842	10.5921	10.5507	10.4292	9.9508
2021-03-27	3.8625	11.7504	8.06049	9.25181	9.78064	10.8842	10.5921	10.5507	10.4292	9.9508
2021-03-28	3.8625	11.7504	8.06049	9.25181	9.78064	10.8842	10.5921	10.5507	10.4292	9.9508
2021-03-29	3.8625	11.7504	8.06049	9.25181	9.78064	10.8842	10.5921	10.5507	10.4292	9.9508
2021-03-30	3.8625	11.7504	8.06049	9.25181	9.78064	10.8842	10.5921	10.5507	10.4292	9.9508
2021-03-31	3.8625	11.7504	8.06049	9.25181	9.78064	10.8842	10.5921	10.5507	10.4292	9.9508
2021-04-01	3.8625	11.7504	8.06049	9.25181	9.78064	10.8842	10.5921	10.5507	10.4292	9.9508		135
2021-04-02	3.8625	11.7504	8.06049	9.25181	9.78064	10.8842	10.5921	10.5507	10.4292	9.9508
2021-04-03	3.8625	11.7504	8.06049	9.25181	9.78064	10.8842	10.5921	10.5507	10.4292	9.9508
2021-04-04	3.8625	11.7504	8.06049	9.25181	9.78064	10.8842	10.5921	10.5507	10.4292	9.9508
2021-04-05	3.8625	11.7504	8.06049	9.25181	9.78064	10.8842	10.5921	10.5507	10.4292	9.9508
2021-04-06	3.8625	11.7504	8.06049	9.25181	9.78064	10.8842	10.5921	10.5507	10.4292	9.9508
2021-04-07	3.8625	11.7504	8.06049	9.25181	9.78064	10.8842	10.5921	10.5507	10.4292	9.9508
2021-04-08	3.8625	11.7504	8.06049	9.25181	9.78064	10.8842	10.5921	10.5507	10.4292	9.9508

## Sheet: Season 2 graph
				0.02 N H2SO4		1 minute sampling of air in Boric acid(15 mL)						TIME: 3-4PM		only boric acid(15ml)=3(titrate reading)
	Ammonia volatilization losses measurement using forced airdraft system.											Date of sowing	2021-11-15
												Date of harvesting	2022-04-05
			SEASON 2									1st dose of fertilizer application	2021-11-15
												2nd dose of fertilizer application	2021-12-17
															0.6
		First dose								second dose
		T-1	T-2	T-3	T-4	T-5	T-6	T-7	T-8	T-9	T-10
	2	12.25	14.84	12.95	15.05	11.55	11.9	12.915	12.32	13.16	12.81
	3	14.14	16.38	12.67	17.92	15.54	17.5	18.41	14.35	22.4	18.27
	4	11.2	12.6	11.2	12.6	9.87	10.85	14.35	11.13	14.35	14.07
	5	9.38	9.8	10.85	9.8	9.1	9.8	10.5	9.1	13.65	12.25
	6	8.75	8.4	9.1	8.4	7.7	9.45	8.4	7.21	12.25	10.43
	7	6.23	8.01	5.51	6.45833	5.56	6.56	7.22	6.56	8.81	7.65
	10	6.23	8.01	5.51	6.45833	5.56	6.56	7.22	6.56	8.81	7.65
	15	6.23	8.01	5.51	6.45833	5.56	6.56	7.22	6.56	8.81	7.65
	20	6.23	8.01	5.51	6.45833	5.56	6.56	7.22	6.56	8.81	7.65
	30	12.6	19.6	16.8	10.71	19.95	17.5	18.9	17.5	19.6	15.05
	31	11.2	13.51	10.85	16.94	11.55	18.76	18.69	17.36	12.95	11.2
	32	9.1	12.32	11.55	12.95	12.46	14.98	12.95	10.85	11.76	10.85
	33	5.95	10.71	10.15	10.15	10.85	12.95	11.55	10.15	10.5	9.87
	34	5.88	9.94	9.38	8.4	9.8	10.36	9.8	9.24	10.15	8.75
	35	4.03	9.46	6.05	7.81	9.24	9.44	9.14	8.8	9.024	8.44
	60	4.03	9.46	6.05	7.81	9.24	9.44	9.14	8.8	9.024	8.44
	80	4.03	9.46	6.05	7.81	9.24	9.44	9.14	8.8	9.024	8.44
	100	4.03	9.46	6.05	7.81	9.24	9.44	9.14	8.8	9.024	8.44
	135	4.03	9.46	6.05	7.81	9.24	9.44	9.14	8.8	9.024	8.44
		T-1
		T-2
		T-3
		T-4
		T-5
		T-6
		T-7
		T-8
		T-9
		T-10

## Sheet: Sheet1
	X	Y	Y	X	Y	Y	X	Y	Y	X	Y	Y	X	Y	Y	X	Y	Y	X	Y	Y	X	Y	Y	X	Y	Y	X	Y	Y
	No of days	T-1 S-1	T-1 S-2	No of days	T-2 S-1	T-2 S-2	No of days	T-3	T-3	No of days	T-4	T-4	No of days	T-5	T-5	No of days	T-6	T-6	No of days	T-7	T-7	No of days	T-8	T-8	No of days	T-9	T-9	No of days	T-10	T-10
	2	18.9	12.25	2	12.09	14.84	2	5.18	12.95	2	7.45	15.05	2	9.09	11.55	2	11.09	11.9	2	12.09	12.915	2	9.09	12.32	2	12.09	13.16	2	12.09	12.81
	3	19.625	14.14	3	41.48	16.38	3	17.77	12.67	3	15.125	17.92	3	21.48	15.54	3	28.48	17.5	3	29.48	18.41	3	21.48	14.35	3	38.48	22.4	3	36.48	18.27
	4	13.7333	11.2	4	38.08	12.6	4	16.48	11.2	4	17.7333	12.6	4	18.08	9.87	4	27.08	10.85	4	28.08	14.35	4	18.08	11.13	4	35.08	14.35	4	31.08	14.07
	5	13.15	9.38	5	26.85	9.8	5	11.48	10.85	5	12.275	9.8	5	14.85	9.1	5	18.85	9.8	5	24.85	10.5	5	14.85	9.1	5	28.85	13.65	5	26.85	12.25
	7	12.03	8.75	7	24.72	8.4	7	9.03	9.1	7	11.4	8.4	7	12.72	7.7	7	11.02	9.45	7	22.72	8.4	7	12.72	7.21	7	18.72	12.25	7	20.72	10.43
	10	4.13288	6.23	10	12.573	8.01	10	8.62472	5.51	10	9.89944	6.45833	10	10.4653	5.56	10	11.6461	6.56	10	11.3336	7.22	10	11.2893	6.56	10	11.1593	8.81	10	10.6474	7.65
	15	4.13288	6.23	15	12.573	8.01	15	8.62472	5.51	15	9.89944	6.45833	15	10.4653	5.56	15	11.6461	6.56	15	11.3336	7.22	15	11.2893	6.56	15	11.1593	8.81	15	10.6474	7.65
	20	4.13288	6.23	20	12.573	8.01	20	8.62472	5.51	20	9.89944	6.45833	20	10.4653	5.56	20	11.6461	6.56	20	11.3336	7.22	20	11.2893	6.56	20	11.1593	8.81	20	10.6474	7.65
	11	4.13288	6.23	11	12.573	8.01	11	8.62472	5.51	11	9.89944	6.45833	11	10.4653	5.56	11	11.6461	6.56	11	11.3336	7.22	11	11.2893	6.56	11	11.1593	8.81	11	10.6474	7.65
	30	12.6	12.6	30	54.44	19.6	30	16.48	16.8	30	18.45	10.71	30	24.44	19.95	30	34.44	17.5	30	34.25	18.9	30	24.44	17.5	30	44.44	19.6	30	40.44	15.05
	31	11.6	11.2	31	76.66	13.51	31	18.92	10.85	31	15.125	16.94	31	26.66	11.55	31	27.66	18.76	31	29.66	18.69	31	26.66	17.36	31	66.66	12.95	31	55.66	11.2
	32	9.03333	9.1	32	69.38	12.32	32	16.5	11.55	32	17.7333	12.95	32	26.38	12.46	32	16.38	14.98	32	26.48	12.95	32	26.38	10.85	32	44.38	11.76	32	56.38	10.85
	33	6.4875	5.95	33	55.83	10.71	33	16.1375	10.15	33	14.275	10.15	33	25.83	10.85	33	15.83	12.95	33	17.83	11.55	33	25.83	10.15	33	35.83	10.5	33	46.83	9.87
	34	5.176	5.88	34	29.77	9.94	34	14.56	9.38	34	11.4	8.4	34	16.77	9.8	34	14.77	10.36	34	14.77	9.8	34	16.77	9.24	34	18.77	10.15	34	14.77	8.75
	35	3.8625	4.03	35	11.7504	9.46	35	8.06049	6.05	35	9.25181	7.81	35	9.78064	9.24	35	10.8842	9.44	35	10.5921	9.14	35	10.5507	8.8	35	10.4292	9.024	35	9.9508	8.44
	60	3.8625	4.03	60	11.7504	9.46	60	8.06049	6.05	60	9.25181	7.81	60	9.78064	9.24	60	10.8842	9.44	60	10.5921	9.14	60	10.5507	8.8	60	10.4292	9.024	60	9.9508	8.44
	80	3.8625	4.03	80	11.7504	9.46	80	8.06049	6.05	80	9.25181	7.81	80	9.78064	9.24	80	10.8842	9.44	80	10.5921	9.14	80	10.5507	8.8	80	10.4292	9.024	80	9.9508	8.44
	100	3.8625	4.03	100	11.7504	9.46	100	8.06049	6.05	100	9.25181	7.81	100	9.78064	9.24	100	10.8842	9.44	100	10.5921	9.14	100	10.5507	8.8	100	10.4292	9.024	100	9.9508	8.44
	135	3.8625	4.03	135	11.7504	9.46	135	8.06049	6.05	135	9.25181	7.81	135	9.78064	9.24	135	10.8842	9.44	135	10.5921	9.14	135	10.5507	8.8	135	10.4292	9.024	135	9.9508	8.44
	T-1	T-2	T-3	T-4	T-5	T-6	T-7	T-8	T-9	T-10
